# Supplementary material for: Do Mothers protect children from deprivation? Comparison of Mother and Child material deprivation within a household
Source: Research Square preprint supplement (doi:10.21203/rs.3.rs-8114476/v1), 2025-12-17
Supplement: Supplementary file 1 [file 7e2d626e5262a98eb2c4c8b9.docx]

**Supplemental Table 1 Item-by-Item Deprivation rates by Household Income Quintile**

|  | **Mother's deprivation rate (%)** | | | | | | |  |
| --- | --- | --- | --- | --- | --- | --- | --- | --- |
|  | quintile1 | quintile2 | quintile3 | quintile4 | quintile5 | chi2 | p | n |
| Meals | 2.1 | 0.0 | 0.0 | 0.0 | 0.0 | 16.42 | 0.003 | 982 |
| Protein | 3.5 | 0.9 | 0.0 | 0.0 | 0.0 | 20.48 | 0 | 1012 |
| Money | 32.3 | 12.6 | 2.6 | 3.0 | 1.0 | 146.21 | 0 | 1009 |
| Shoes | 10.9 | 2.2 | 0.5 | 0.0 | 0.5 | 60.62 | 0 | 1012 |
| Clothes | 17.9 | 4.9 | 0.5 | 0.0 | 0.0 | 104.29 | 0 | 1011 |
| Hobby | 45.3 | 21.1 | 7.7 | 8.1 | 3.6 | 161.12 | 0 | 1011 |
| Doctor | 10.9 | 3.1 | 0.5 | 0.5 | 0.0 | 56.45 | 0 | 1012 |
|  |  |  |  |  |  |  |  |  |
|  | **Child's deprivation rate (%) : Child-reported** | | | | | | |  |
|  | quintile1 | quintile2 | quintile3 | quintile4 | quintile5 | chi2 | p | n |
| Meals | 4.0 | 2.7 | 1.5 | 0.5 | 0.0 | 11.83 | 0.019 | 1001 |
| Protein | 5.5 | 1.4 | 2.1 | 1.0 | 0.0 | 17.55 | 0.002 | 1001 |
| Money | 18.5 | 10.7 | 11.8 | 7.1 | 12.4 | 13.02 | 0.011 | 1015 |
| Shoes | 11.2 | 8.5 | 6.7 | 2.5 | 2.6 | 19.22 | 0.001 | 1015 |
| Clothes | 9.3 | 7.1 | 3.6 | 1.0 | 2.6 | 20.43 | 0 | 1015 |
| Hobby | 20.9 | 12.6 | 10.3 | 6.1 | 9.8 | 23.36 | 0 | 1015 |
| Doctor | 6.9 | 1.8 | 2.6 | 0.0 | 0.5 | 22.50 | 0 | 1000 |
|  |  |  |  |  |  |  |  |  |
|  | **Child's deprivation rate (%) : Mother-reported** | | | | | | |  |
|  | quintile1 | quintile2 | quintile3 | quintile4 | quintile5 | chi2 | p | n |
| Meals | 2.5 | 0.9 | 0.0 | 0.0 | 0.0 | 13.51 | 0.009 | 1013 |
| Protein | 3.5 | 0.5 | 0.0 | 0.0 | 0.0 | 23.29 | 0 | 1012 |
| Money | 12.8 | 3.6 | 1.0 | 1.0 | 0.5 | 58.39 | 0 | 1013 |
| Shoes | 8.9 | 1.8 | 0.5 | 0.5 | 0.0 | 47.82 | 0 | 1011 |
| Clothes | 10.3 | 2.3 | 1.0 | 0.0 | 0.5 | 53.00 | 0 | 1010 |
| Hobby | 15.9 | 2.7 | 0.5 | 0.5 | 1.0 | 88.59 | 0 | 1008 |
| Doctor | 3.0 | 0.5 | 0.5 | 0.0 | 0.0 | 15.73 | 0.003 | 1010 |

**Supplemental Table 2 Percentage of Mother-child pairs by number of ‘Protecting’ and ‘Exposing’ behaviors**

| Protecting behaviors | | | Exposing behaviors | |
| --- | --- | --- | --- | --- |
| # of items where Child is not deprived,  but mother is. | | | # of items where Mother is NOT deprived,  but child is | |
|  | Child reported | Mother reported | Child reported | Mother reported |
| 0 | 84.3% | 83.1% | 79.6% | 95.9% |
| 1 | 9.1% | 9.8% | 13.9% | 3.7% |
| 2 | 3.7% | 4.7% | 4.5% | 0.5% |
| 3 | 1.9% | 2.0% | 1.2% | 0.0% |
| 4 | 0.8% | 0.5% | 0.6% | 0.0% |
| 5 | 0.0% | 0.0% | 0.1% | 0.0% |
| 6 | 0.1% | 0.0% | 0.0% | 0.0% |
| 7 | 0.0% | 0.0% | 0.1% | 0.0% |

**Supplemental Table 3 Percentage (%) of mother-child deprivation patterns using Method 2**

| **(A) Mother's deprivation and Child-reported Child deprivation** | | | | | | |
| --- | --- | --- | --- | --- | --- | --- |
|  | n | Congruous Non-dep | Incongruous Exposed | Incongruous Protected | Congruous  Deprived |  |
| **All** | **1083** | 66 | 20 | 14 | 0- |  |
| **Child characteristics** |  |  |  |  |  |  |
| Grade 4 to 6 | 269 | 68 | 20 | 12 |  | NS |
| Grade 7 to 9 | 405 | 66 | 19 | 15 |  |
| Grade 10 to 12 | 409 | 65 | 21 | 15 |  |
| Boy | 533 | 64 | 21 | 14 |  | NS |
| Girl | 525 | 68 | 18 | 14 |  |
| First child | 559 | 68 | 19 | 14 |  | NS |
| Second and subsequent child | 524 | 64 | 21 | 15 |  |
| **Mother characteristics**  Employment status |  |  |  |  |  |  |
| Mother full-time employed | 335 | 68 | 20 | 12 |  | NS |
| Mother part-time employed | 578 | 64 | 20 | 16 |  |
| Mother Not employed | 149 | 70 | 19 | 11 |  |
| Mother’s age  30-39 | 142 | 54 | 20 | 25 |  | *** |
| 40-49 | 643 | 69 | 20 | 12 |  |
| 50-60 | 273 | 66 | 21 | 13 |  |
| Mother's education  Middle school | 38 | 34 | 18 | 47 |  | *** |
| High school | 322 | 61 | 18 | 21 |  |
| Junior colleges/specialized schools | 328 | 73 | 23 | 4 |  |
| University | 273 | 73 | 23 | 4 |  |
| **Household characteristics** |  |  |  |  |  |  |
| Two-parent | 945 | 68 | 20 | 12 |  | *** |
| One-parent | 138 | 49 | 21 | 30 |  |
| Number of children One | 216 | 70 | 16 | 14 |  | * |
| Two | 537 | 67 | 20 | 13 |  |
| Three | 271 | 63 | 24 | 14 |  |
| Four | 59 | 51 | 20 | 29 |  |
| Household Income  1st quintile | 185 | 41 | 22 | 38 |  | *** |
| 2nd quintile | 207 | 60 | 20 | 19 |  |
| 3rd quintile | 186 | 73 | 22 | 5 |  |
| 4th quintile | 189 | 80 | 14 | 6 |  |
| 5th quintile | 189 | 78 | 19 | 3 |  |

| **(B) Mother's deprivation and Mother-reported Child deprivation** | | | | | |  |
| --- | --- | --- | --- | --- | --- | --- |
|  | n | Congruous Non-dep | Incongruous Exposed | Incongruous Protected | Congruous  Deprived |  |
| **All** | **1095** | 80 | 3 | 17 | 0 |  |
| **Child characteristics** |  |  |  |  |  |  |
| Grade 4 to 6 | 275 | 82 | 3 | 16 |  | NS |
| Grade 7 to 9 | 412 | 79 | 3 | 17 |  |
| Grade 10 to 12 | 408 | 80 | 2 | 18 |  |
| Boy | 538 | 79 | 3 | 18 |  | NS |
| Girl | 530 | 81 | 3 | 16 |  |
| First child | 567 | 82 | 2 | 16 |  | NS |
| Second and subsequent child | 528 | 78 | 3 | 19 |  |
| **Mother characteristics** |  |  |  |  |  |  |
| Mother full-time employed | 342 | 84 | 3 | 13 |  | NS |
| Mother part-time employed | 582 | 79 | 3 | 19 |  |
| Mother Not employed | 151 | 79 | 1 | 19 |  |
| Mother’s age  30-39 | 147 | 67 | 5 | 28 |  | *** |
| 40-49 | 646 | 82 | 3 | 15 |  |
| 50-60 | 276 | 81 | 2 | 17 |  |
| Mother's education  Middle school | 39 | 41 | 8 | 51 |  | *** |
| High school | 328 | 73 | 5 | 22 |  |
| Junior colleges/specialized schools | 328 | 81 | 1 | 18 |  |
| University | 277 | 94 | 1 | 5 |  |
| **Household characteristics** |  |  |  |  |  |  |
| Two-parent | 954 | 84 | 2 | 14 |  | *** |
| One-parent | 141 | 55 | 8 | 37 |  |
| Number of children One | 219 | 80 | 3 | 16 |  | ** |
| Two | 543 | 83 | 2 | 15 |  |
| Three | 275 | 77 | 3 | 20 |  |
| Four | 58 | 66 | 7 | 28 |  |
| Household Income  1st quintile | 189 | 47 | 9 | 44 |  | *** |
| 2nd quintile | 211 | 74 | 2 | 24 |  |
| 3rd quintile | 186 | 91 | 2 | 7 |  |
| 4th quintile | 192 | 91 | 1 | 8 |  |
| 5th quintile | 188 | 96 | 1 | 4 |  |

**Supplemental Table 4 Results of Regression Models for Child Psychological Wellbeing (Method 1 Those above 15 years old)**

| 1. **Enjoy Life** | | 1. Dep. Pattern Using **Child** reported   (n = 330) | | | | | | |  | 1. Dep. Pattern Using **Mother** reported   (n = 330) | | | | | | | |
| --- | --- | --- | --- | --- | --- | --- | --- | --- | --- | --- | --- | --- | --- | --- | --- | --- | --- |
|  |  | Coef. |  |  | 95% c.i. | |  |  |  | Coef. |  |  | 95% c.i. | |  |  |  |
|  | Cong. Non-deprived | <base> | | | | | |  |  | <base> | | | | | | |  |
|  | Exposed | -0.59 |  | [ | -1.34 | ー | 0.17 | ］ |  | -1.43 |  | [ | -3.30 | ー | 0.44 | ］ |  |
|  | Protected | -0.31 |  | [ | -1.22 | ー | 0.59 | ］ |  | -0.60 |  | [ | -1.44 | ー | 0.25 | ］ |  |
|  | Cong. deprived | -1.29 |  | [ | -3.45 | ー | 0.86 | ］ |  | 0.28 |  | [ | -2.67 | ー | 3.23 | ］ |  |
| 1. **My family thinks I am important** | | | (n = 332) | | | | |  |  |  | (n = 331) | | | | |  |  |
|  |  | Coef. |  |  | 95% c.i. | |  |  |  | Coef. |  |  | 95% c.i. | |  |  |  |
|  | Cong. Non-deprived | <base> | | | | | |  |  | <base> | | | | | |  |  |
|  | Exposed | -0.36 |  | [ | -0.72 | ー | 0.01 | ］ |  | -0.84 |  | [ | -1.68 | ー | 0.05 | ］ |  |
|  | Protected | 0.17 |  | [ | -0.27 | ー | 0.62 | ］ |  | -0.11 |  | [ | -0.51 | ー | 0.28 | ］ |  |
|  | Cong. deprived | -1.41 | *** | [ | -2.38 | ー | -0.45 | ］ |  | -0.37 |  | [ | -1.17 | ー | 1.91 | ］ |  |
| 1. **I am a valuable individual.** | |  | (n = 334) | | | | |  |  |  | (n =333) | | | | | |  |
|  |  | Coef. |  |  | 95% c.i. | |  |  |  | Coef. |  |  | 95% c.i. | |  |  |  |
|  | Cong. Non-deprived | <base> | | | | | |  |  | <base> | | | | | |  |  |
|  | Exposed | -0.47 | *** | [ | -0.79 | ー | -0.16 | ］ |  | -0.24 |  | [ | -1.02 | ー | 0.55 | ］ |  |
|  | Protected | 0.11 |  | [ | -0.26 | ー | 0.48 | ］ |  | 0.02 |  | [ | -0.35 | ー | 0.36 | ］ |  |
|  | Cong. deprived | -0.96 | ** | [ | -1.86 | ー | -0.05 | ］ |  | -0.09 |  | [ | -1.38 | ー | 1.19 | ］ |  |
| * Results of tobit regression with child outcomes as dependent variable and Mother-child deprivation category as independent variable, controlling for child sex, age, household income quintile and household type (single or two-parent). | | | | | | | | | | | | | | | | |  |
|  |

**Supplemental Table 5 Results of Regression Models for Child Psychological Wellbeing (Method 2 all children)**

| 1. **Enjoy Life** | | 1. Dep. Pattern Using **Child** reported   (n = 941) | | | | | | |  | 1. Dep. Pattern Using **Mother** reported   (n = 950) | | | | | | | |
| --- | --- | --- | --- | --- | --- | --- | --- | --- | --- | --- | --- | --- | --- | --- | --- | --- | --- |
|  |  | Coef. |  |  | 95% c.i. | |  |  |  | Coef. |  |  | 95% c.i. | |  |  |  |
|  | Cong. Non-deprived | <base> | | | | | |  |  | <base> | | | | | | |  |
|  | Exposed | -0.56 | *** | [ | -0.98 | ー | -0.14 | ］ |  | -1.53 | *** | [ | -2.52 | ー | -0.54 | ］ |  |
|  | Protected | 0.29 |  | [ | -0.48 | ー | 0.54 | ］ |  | -0.19 |  | [ | -0.66 | ー | 0.28 | ］ |  |
|  |  |  |  |  |  |  |  |  |  |  |  |  |  |  |  |  |  |
| 1. **My family thinks I am important** | | | (n = 943) | | | | |  |  |  | (n = 952) | | | | |  |  |
|  |  | Coef. |  |  | 95% c.i. | |  |  |  | Coef. |  |  | 95% c.i. | |  |  |  |
|  | Cong. Non-deprived | <base> | | | | | |  |  | <base> | | | | | |  |  |
|  | Exposed | -0.50 | *** | [ | -0.75 | ー | -0.25 | ］ |  | -1.08 | *** | [ | -1.62 | ー | -0.54 | ］ |  |
|  | Protected | -0.12 |  | [ | -0.43 | ー | 0.18 | ］ |  | -0.18 |  | [ | -0.46 | ー | 0.09 | ］ |  |
|  |  |  |  |  |  |  |  |  |  |  |  |  |  |  |  |  |  |
| 1. **I am a valuable individual.** | |  | (n = 943) | | | | |  |  |  | (n =952) | | | | | |  |
|  |  | Coef. |  |  | 95% c.i. | |  |  |  | Coef. |  |  | 95% c.i. | |  |  |  |
|  | Cong. Non-deprived | <base> | | | | | |  |  | <base> | | | | | |  |  |
|  | Exposed | -0.29 | *** | [ | -0.47 | ー | -0.11 | ］ |  | -0.39 |  | [ | -0.81 | ー | 0.04 | ］ |  |
|  | Protected | -0.04 |  | [ | -0.25 | ー | 0.18 | ］ |  | -0.04 |  | [ | -0.24 | ー | 0.16 | ］ |  |
|  |  |  |  |  |  |  |  |  |  |  |  |  |  |  |  |  |  |
| * Results of tobit regression with child outcomes as dependent variable and Mother-child deprivation category as independent variable, controlling for child sex, age, household income quintile and household type (single or two-parent). | | | | | | | | | | | | | | | | |  |
|  |
